# Supplementary material for: Dynamic behavior of DNA topoisomerase IIβ in response to DNA double-strand breaks
Source: PubMed Central journal article supplement (PMC6037730; doi:10.1038/s41598-018-28690-6), 2018-07-09
Supplement: 41598_2018_28690_MOESM1_ESM.pdf [file 41598_2018_28690_MOESM1_ESM.pdf]

## Supplementary Information

Dynamic behavior of DNA topoisomerase II $\beta$  in response to DNA double-strand breaks

Keiko Morotomi-Yano<sup>1</sup>, Shinta Saito<sup>2</sup>, Noritaka Adachi<sup>2,3</sup>, Ken-ichi Yano<sup>1,\*</sup>

<sup>1</sup> Department of Bioelectrics, Institute of Pulsed Power Science, Kumamoto University,  
Kumamoto 860-8555, Japan

<sup>2</sup> Department of Life and Environmental System Science, Graduate School of Nanobioscience,  
Yokohama City University, Yokohama 236-0027, Japan

<sup>3</sup> Advanced Medical Research Center, Yokohama City University, Yokohama 236-0004, Japan

\* Correspondence should be addressed to K. Y. (e-mail: yanoken@kumamoto-u.ac.jp)

## **Supplementary Methods**

### ***NCS treatment and immunofluorescent analysis of Nalm-6 cells***

Neocarzinostatin (NCS) was purchased from Sigma-Aldrich (St. Louis, MO, USA). Wild-type and Topo II $\beta$  knockout Nalm-6 cells were suspended in RPMI medium containing 10% fetal bovine serum (FBS) and treated with and without 250 ng/ml NCS at 37°C for 2 h. Cells were collected by brief centrifugation and resuspended in RPMI medium without FBS. Cell suspension was incubated on a chamber slide at 37°C for 30 min to allow cell attachment. Attached cells were fixed with 4% paraformaldehyde dissolved in Dulbecco's phosphate-buffered saline (D-PBS) for 30 min at 4°C. After washing with D-PBS, cells were permeabilized with 0.1% Triton X-100 in D-PBS for 3 min, subsequently blocked with 1% bovine serum albumin in D-PBS for 15 min, and reacted with anti-Rad51 antibody (GTX100469, GeneTex, Irvine, CA, USA). After washing with D-PBS, cells were incubated with fluorescent secondary antibodies and subsequently mounted in a Vectashield mounting medium containing 4',6-diamidino-2-phenylindole (DAPI) (Vector Laboratories, Burlingame, CA, USA).

**Figure S1**

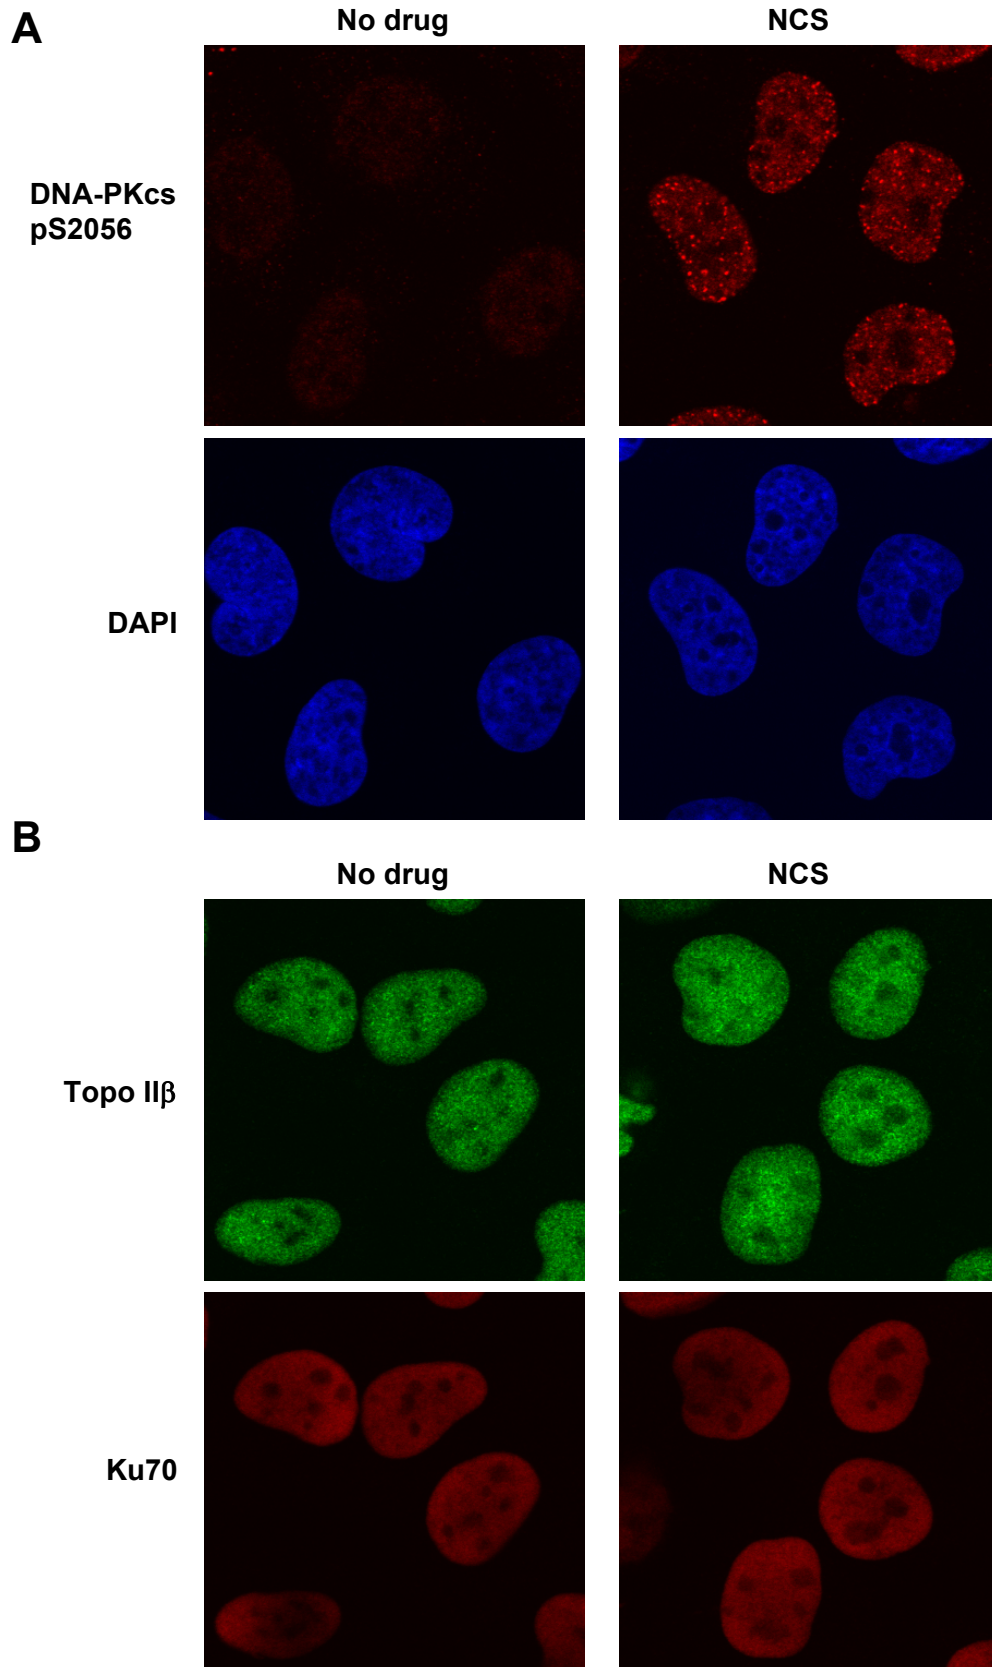

**Supplementary Figure S1 Immunofluorescent analysis of Topo II $\beta$  and Ku in cells treated with neocarzinostatin.** A. HeLa cells were incubated with and without 250 ng/ml neocarzinostatin (NCS) at 37°C for 2 h and subsequently subjected to immunofluorescent staining of phosphorylated DNA-PKcs at S2056 (pS2056). Nuclear DNA was stained with DAPI. B. HeLa cells were incubated with and without NCS as described in A and subsequently subjected to coimmunofluorescent staining of Topo II $\beta$  and Ku70.

## Figure S2

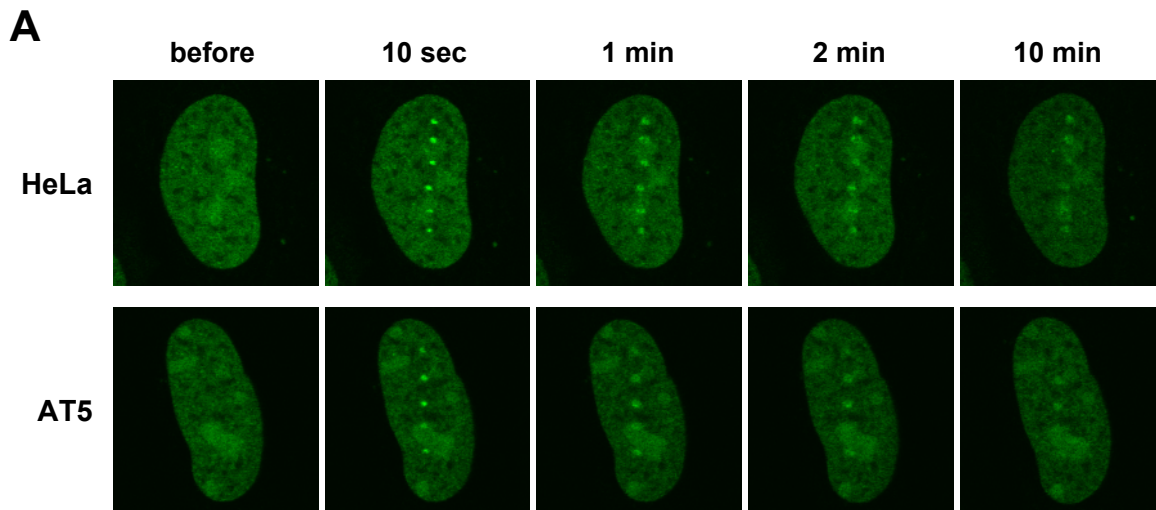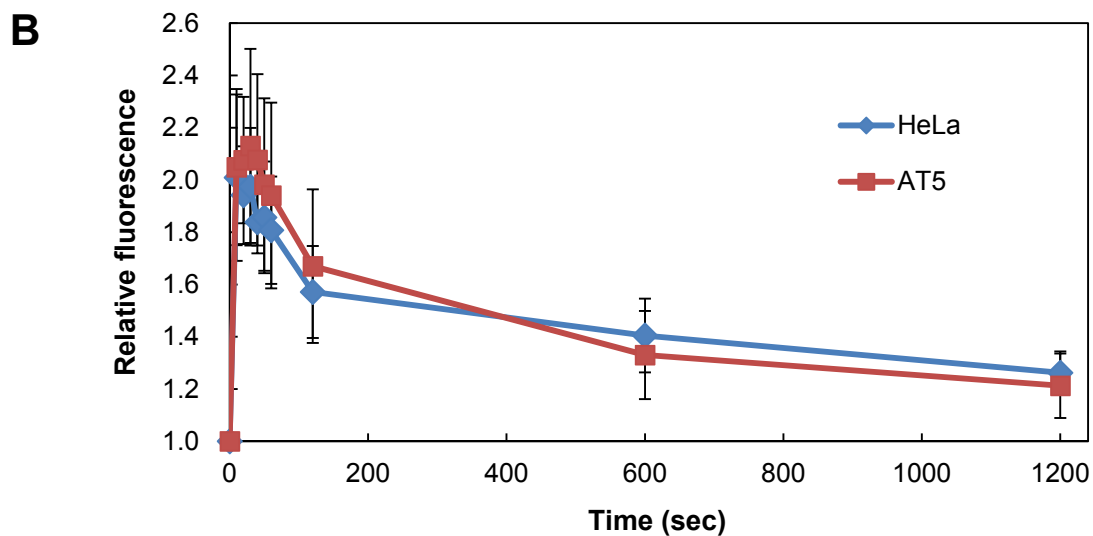

**Supplementary Figure S2 Live imaging of Topo II $\beta$  recruitment to laser-damaged sites in ATM-proficient and -deficient cells.** A. EGFP-Topo II $\beta$  was transiently expressed in HeLa and ATM-deficient AT5 cells. DNA damage was induced with shots of a pulsed UVA laser, and recruitment of EGFP-Topo II $\beta$  to the damaged sites was monitored by time-lapse microscopy. Representative images at the indicated time points are shown. B. Time-course of EGFP-Topo II $\beta$  recruitment to laser-damaged sites in AT5 and HeLa cells. DNA damage was induced in the nucleus with a single shot of a pulsed UVA laser. After time-lapse imaging, EGFP signals in the damaged site were quantified, and average values with SD were calculated from 10 cells.

## Figure S3

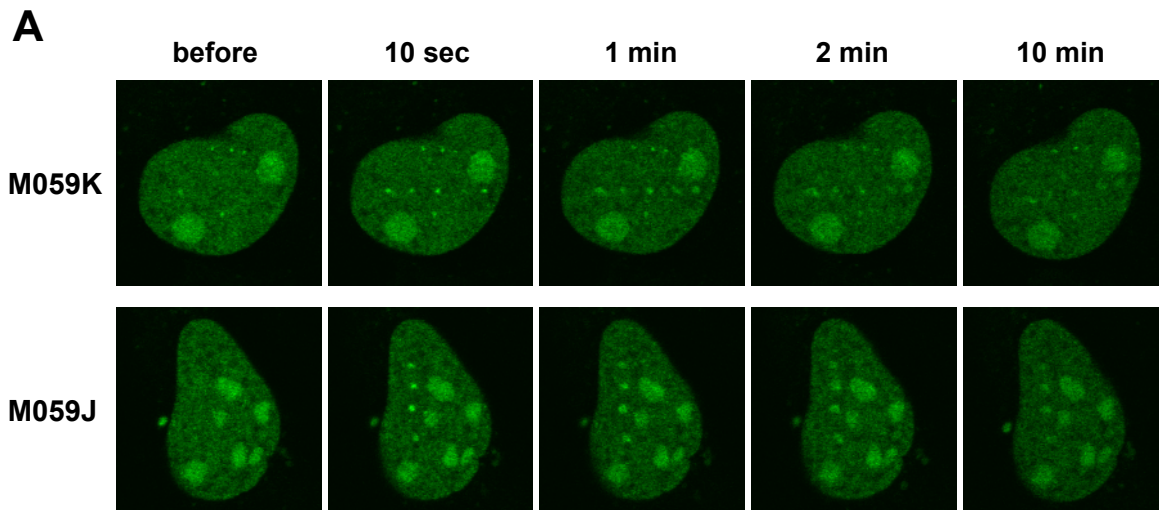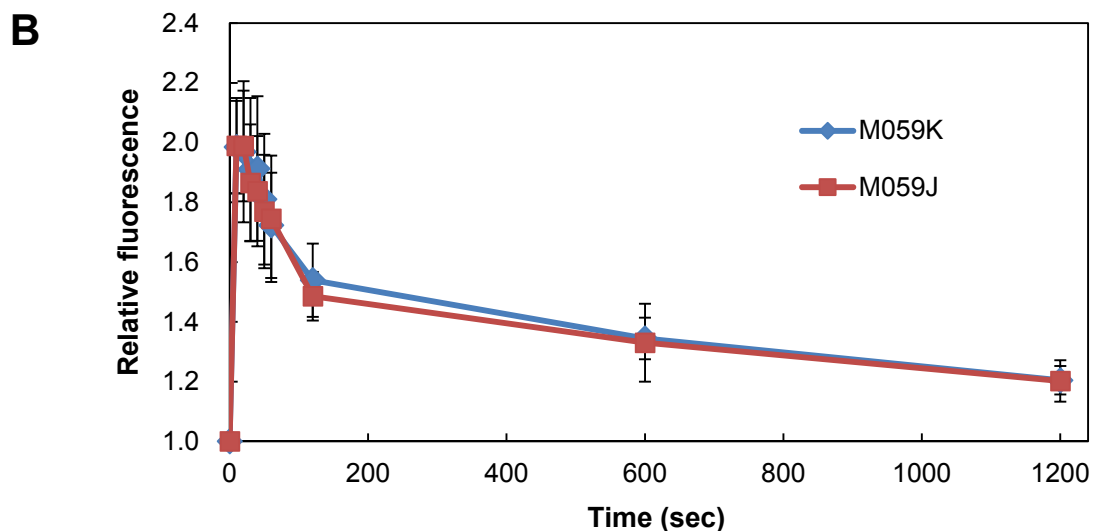

**Supplementary Figure S3 Live imaging of Topo II $\beta$  recruitment to laser-damaged sites in DNA-PKcs-proficient and -deficient cells.** A. EGFP-Topo II $\beta$  was transiently expressed in the DNA-PKcs-proficient M059K and -deficient M059J cells. DNA damage was induced with shots of a pulsed UVA laser, and recruitment of EGFP-Topo II $\beta$  to the damaged sites was monitored by time-lapse microscopy. Representative images at the indicated time points are shown. B. Time-course of EGFP-Topo II $\beta$  recruitment to laser-damaged sites in M059K and M059J cells. DNA damage was induced in the nucleus with a single shot of a pulsed UVA laser. After time-lapse imaging, EGFP signals in the damaged site were quantified, and average values with SD were calculated from 10 cells.

## Figure S4

A

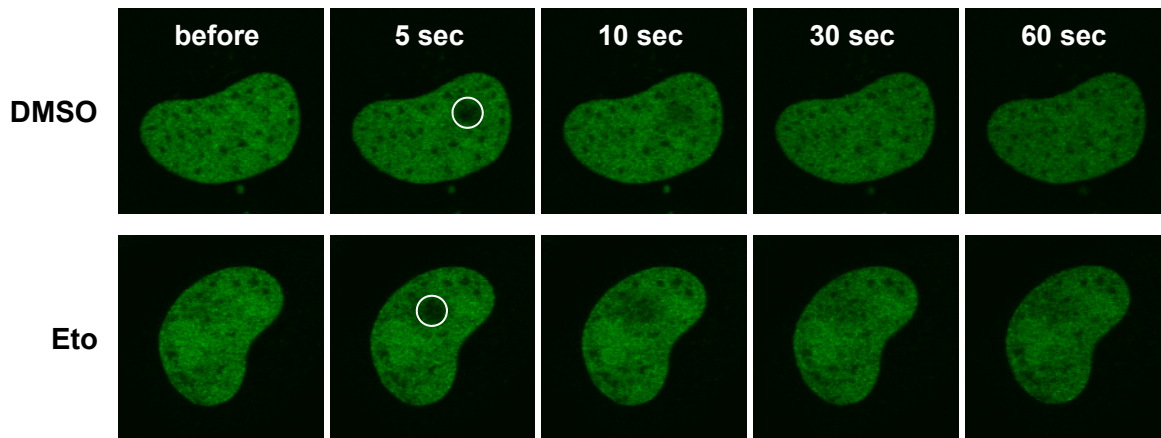

B

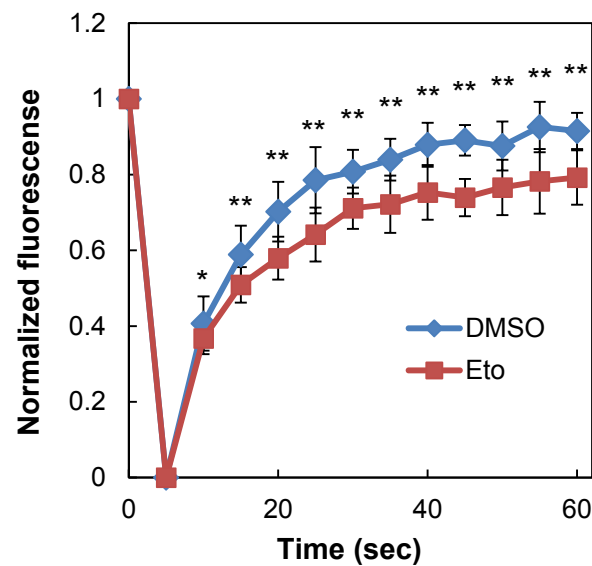

### Supplementary Figure S4 Nuclear mobility of EGFP-Topo II $\beta$ in etoposide-treated cells.

A. Representative images of FRAP analysis in the presence and absence of etoposide. HeLa cells expressing EGFP-Topo II $\beta$  were pretreated with either 25  $\mu$ M etoposide (Eto) or DMSO for 2 h. A small nuclear area indicated by a white circle in the nucleus was photobleached, and fluorescent images were obtained at the indicated time points. B. Quantification of fluorescent signals of EGFP-Topo II $\beta$  in FRAP analysis. Fluorescent images were obtained at 5 sec intervals. Mean values with SD from 10 cells were plotted (\*,  $p < 0.05$ ; \*\*,  $p < 0.01$ ).

**Figure S5**

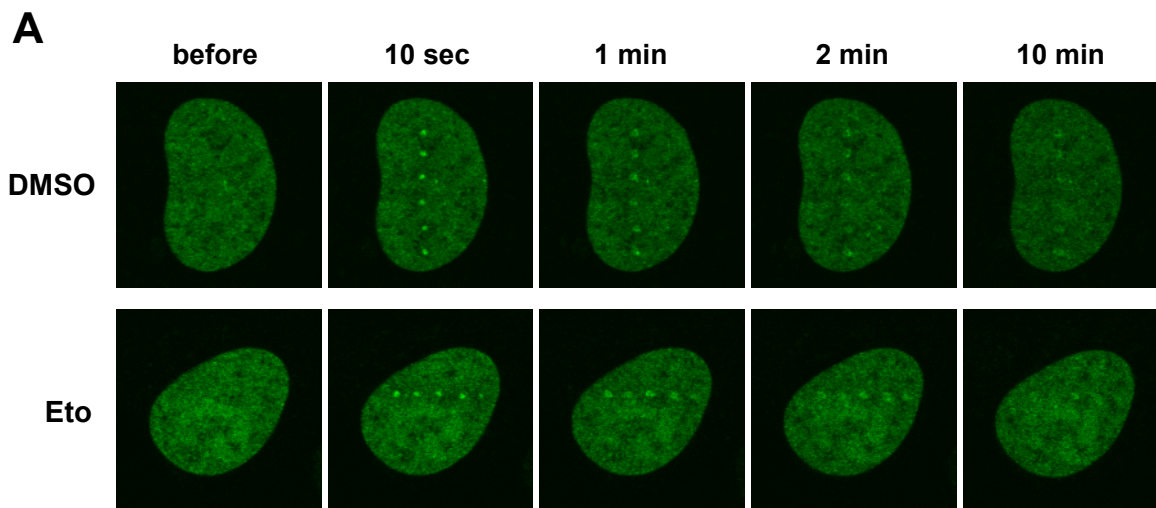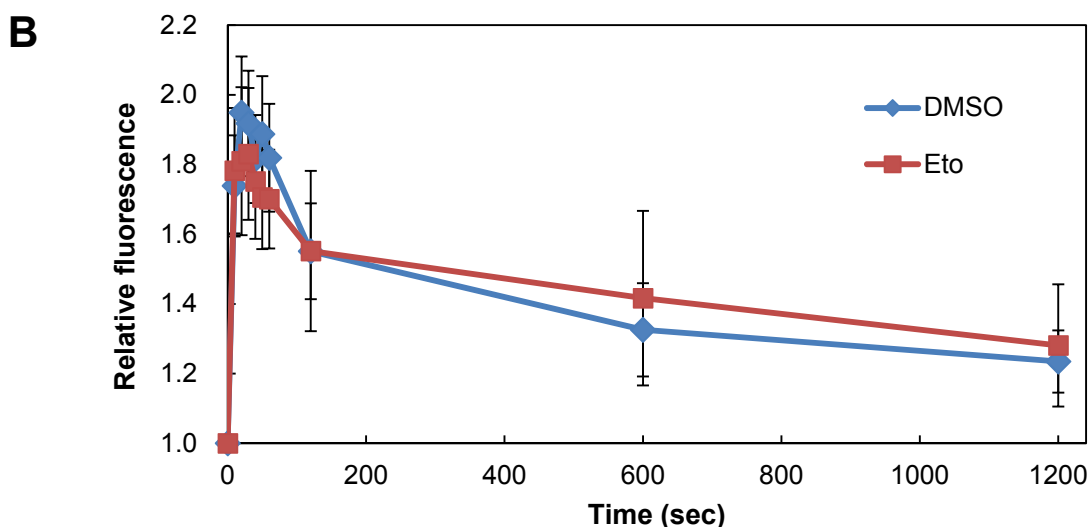

**Supplementary Figure S5 Recruitment of EGFP-Topo II $\beta$  to laser-damaged sites in etoposide-treated cells.** A. Recruitment of EGFP-Topo II $\beta$  to laser-damaged sites in the presence and absence of etoposide. HeLa cells expressing EGFP-Topo II $\beta$  were pretreated with either 25  $\mu$ M etoposide (Eto) or DMSO for 2 h. DNA damage was induced with shots of a pulsed UVA laser, and recruitment of EGFP-Topo II $\beta$  to the damaged sites was monitored by time-lapse microscopy. Representative images at the indicated time points are shown. B. Time-course of EGFP-Topo  $\beta$  recruitment to laser-damaged sites in the presence and absence of etoposide. DNA damage was induced in the nucleus with a single shot of a pulsed UVA laser. After time-lapse imaging, EGFP signals in the damaged site were quantified, and average values with SD were calculated from 10 cells.
